# Supplementary material
Source: Atypon-hosted journal article supplement (https://static.yanyin.tech/literature/current_protocol/10.1002/cpz1.943/attachments/downloadSupplement)

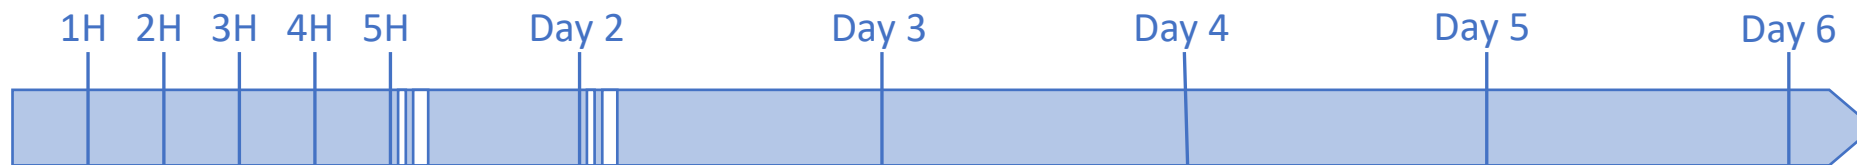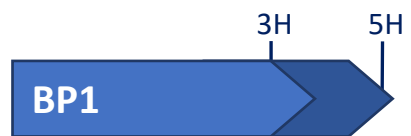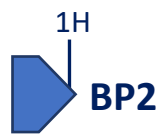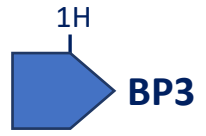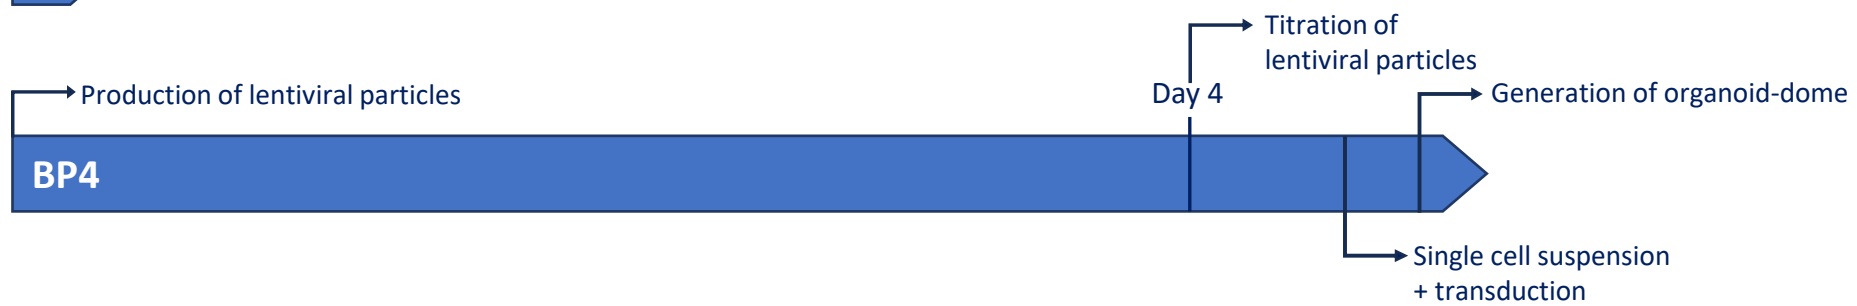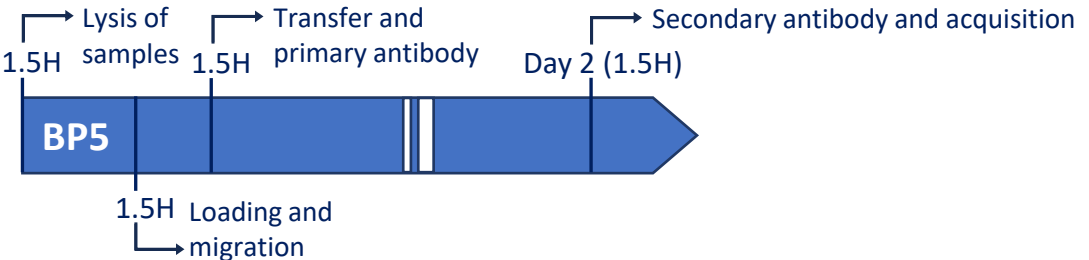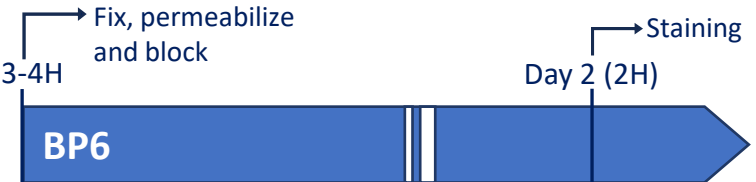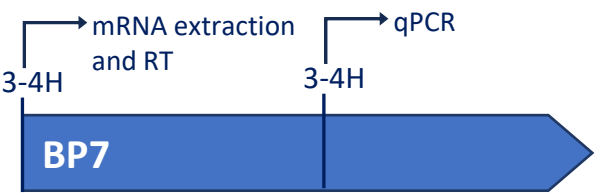

Supplement: downloadSupplement [file downloadSupplement]
